# Supplementary material for: Characterization of Partially Purified Bacteriocins Produced by Enterococcus faecium Strains Isolated from Soybean Paste Active Against Listeria spp. and Vancomycin-Resistant Enterococci
Source: MDPI journal article supplement (doi:10.3390/microorganisms9051085), 2021-05-18
Supplement: s1 [file s1]

## Supplementary Material

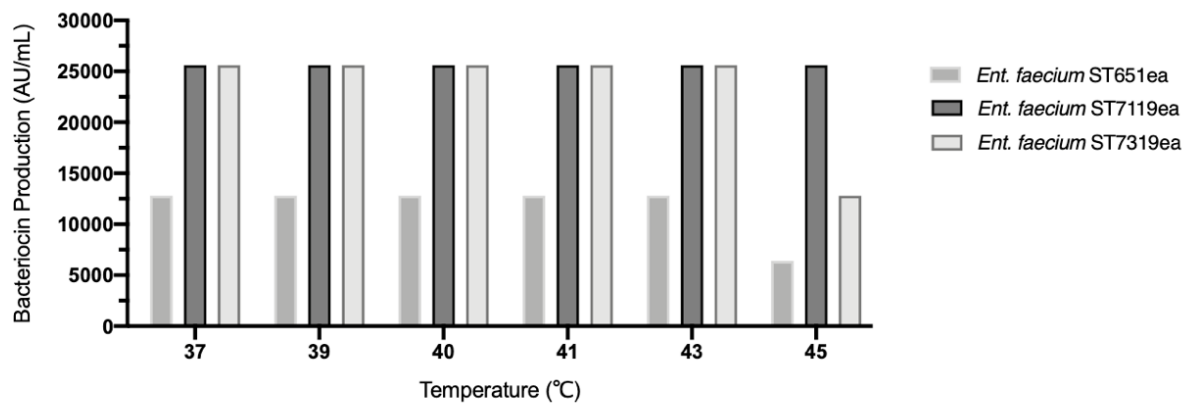

**Figure S1.** Identification of bacteriocin production of strains *Ent. faecium* ST651ea, *Ent. faecium* ST7119ea, and *Ent. faecium* ST7319ea in varying temperatures.

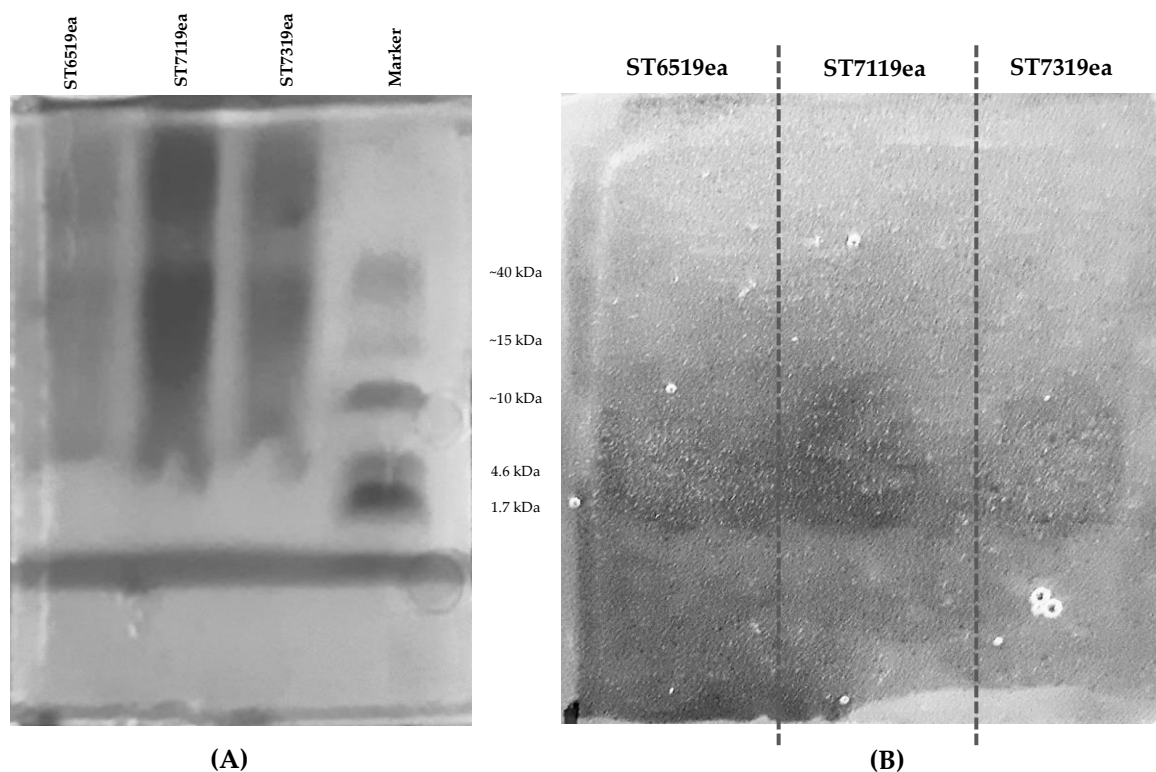

**Figure S2.** Tricine-SDS-PAGE images of bacteriocins expressed by *E. faecium* strains ST651ea, ST7119ea, and ST7319ea (A) stained by Coomassie-blue R250 and (B) confirmation of the location and size estimation of the expressed proteins on the gel overlaid with BHI inoculated with *L. monocytogenes* ATCC15313.

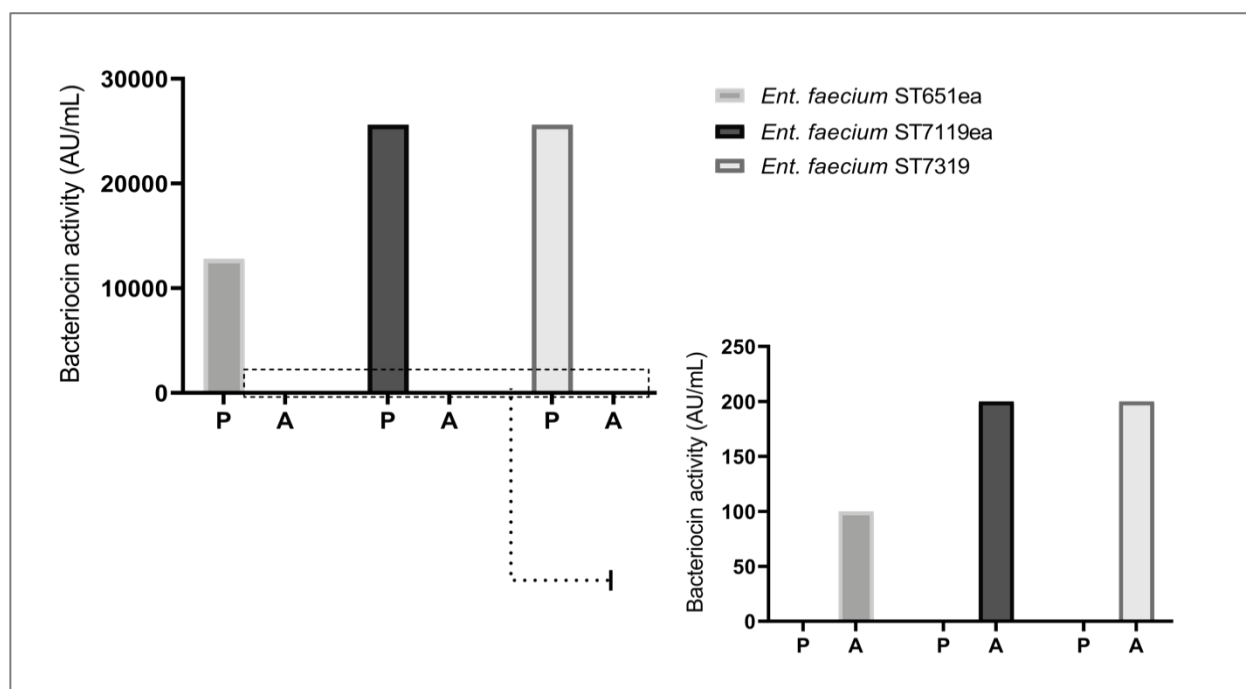

**Figure S3.** Measured (A) adhered bacteriocins to the producer cells' surface as shown in in comparison with the (P) produced bacteriocin quantified against *L. monocytogenes* ATCC15313.

(A) Bacteriocin ST651ea

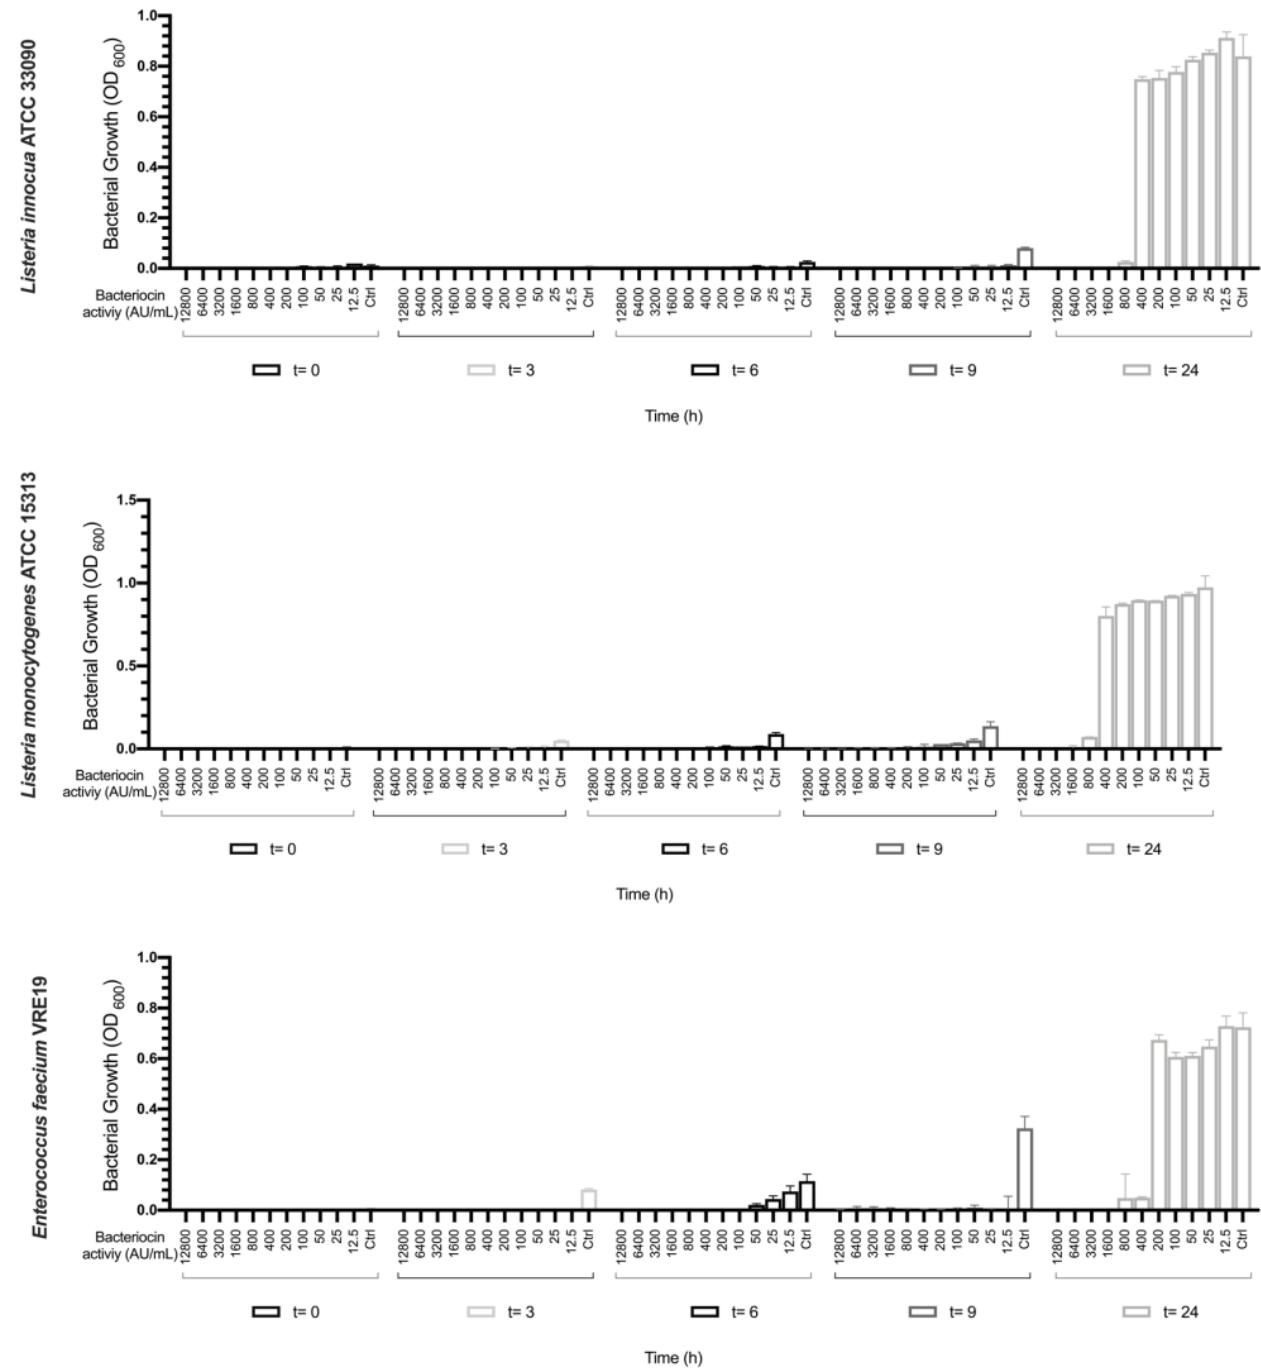

(B) Bacteriocin ST7119ea

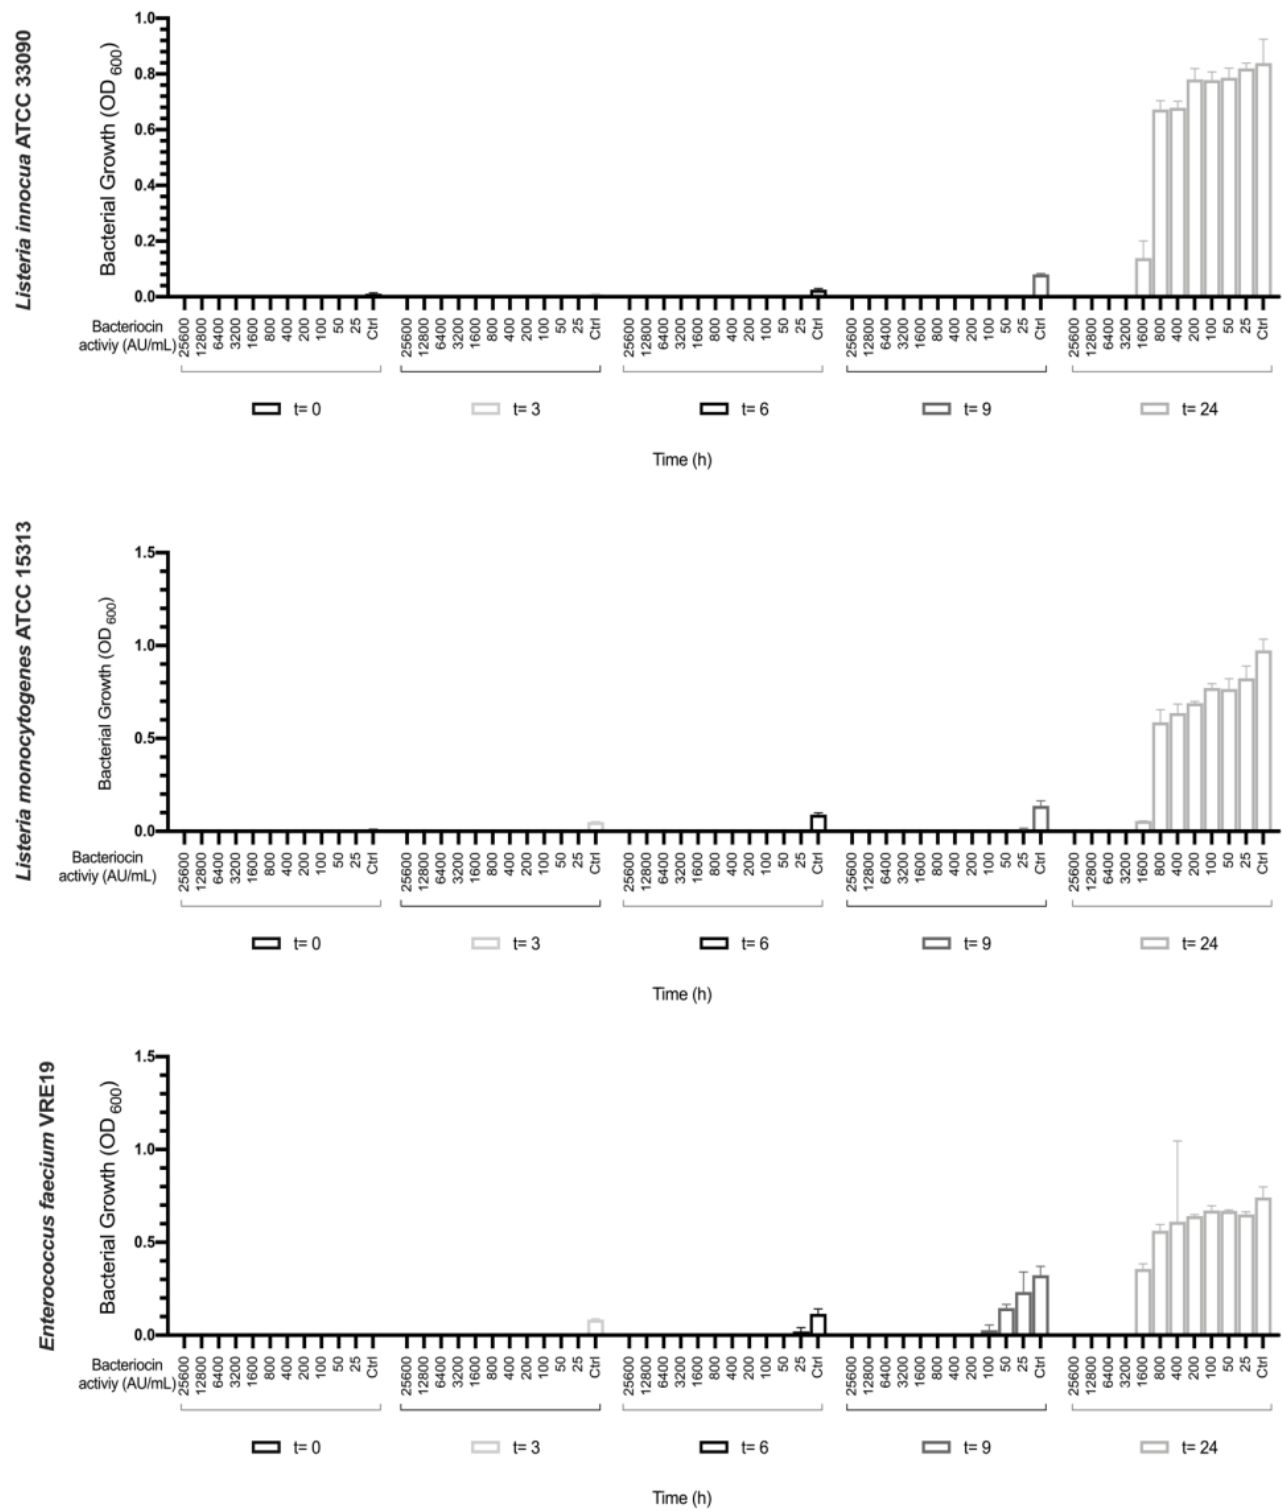

(C) Bacteriocin ST7319ea

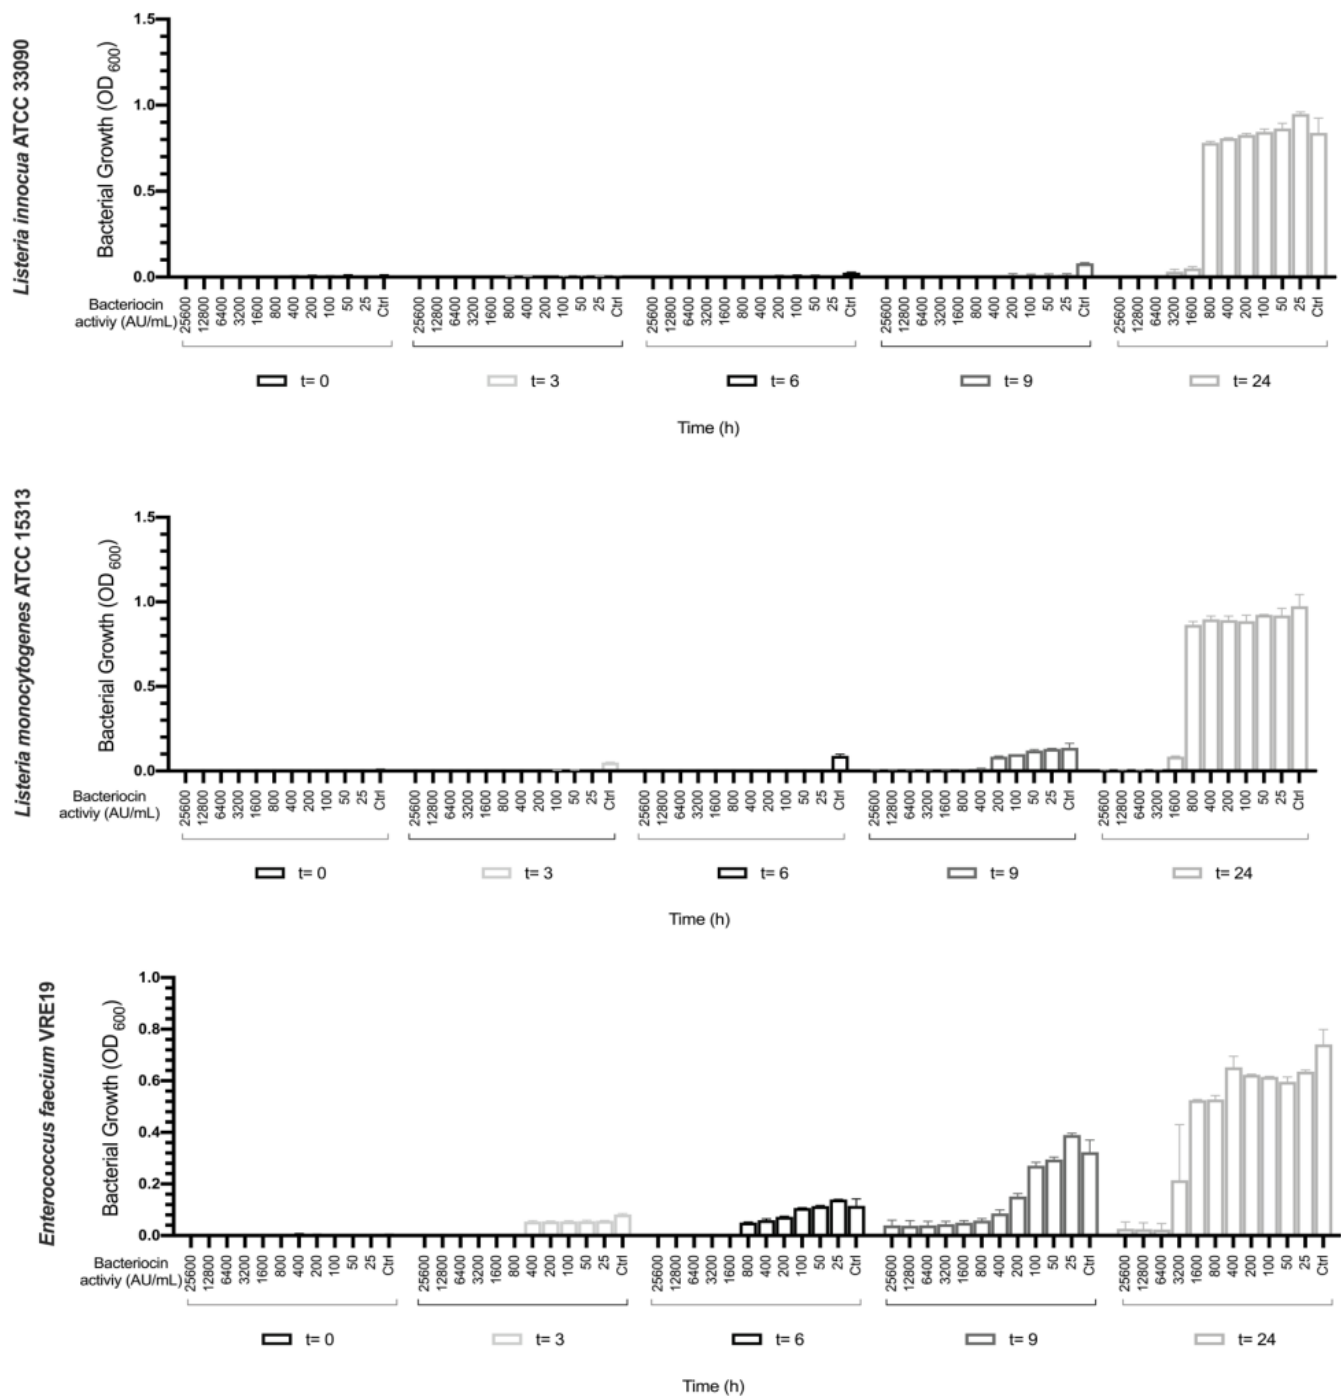

**Figure S4.** Effect of partially purified bacteriocins (A) ST651ea, (B) ST7119ea, and (C) ST7319ea on the growth of *Listeria innocua* ATCC33090, *Listeria monocytogenes* ATCC15313, and *Ent. faecium* VRE19

(A) Bacteriocin ST651ea

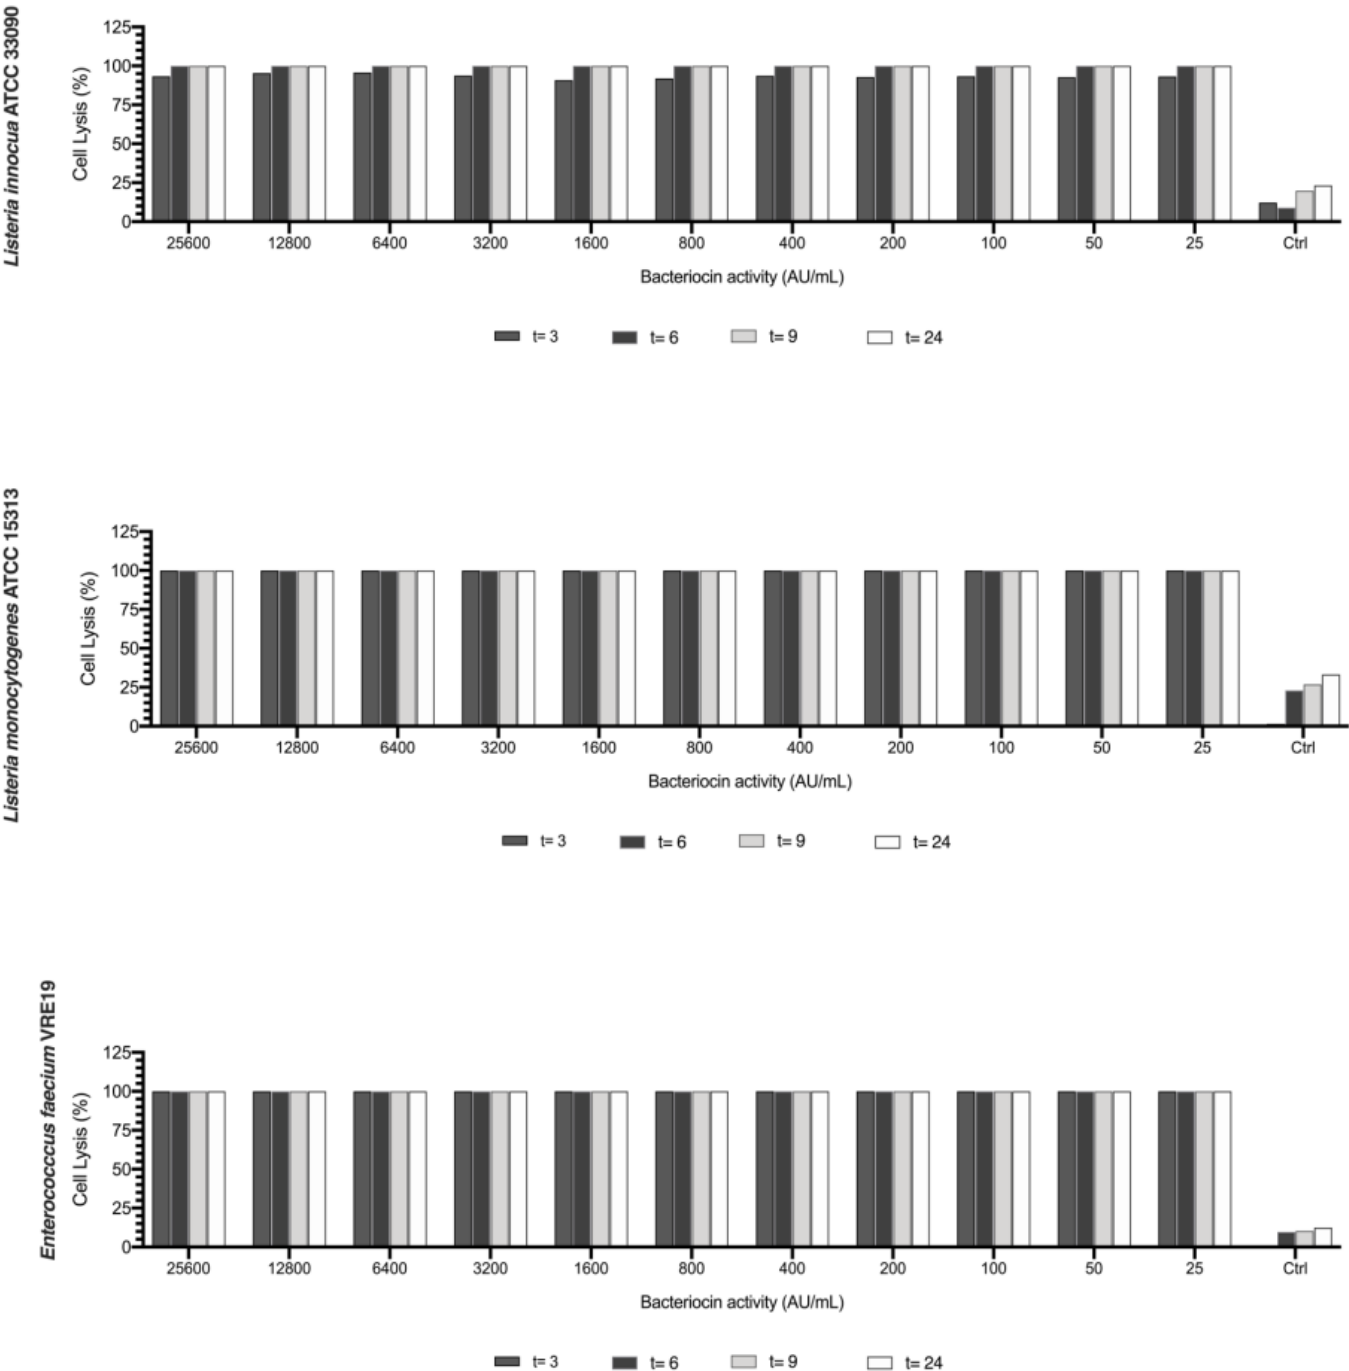

(B) Bacteriocin ST7119ea

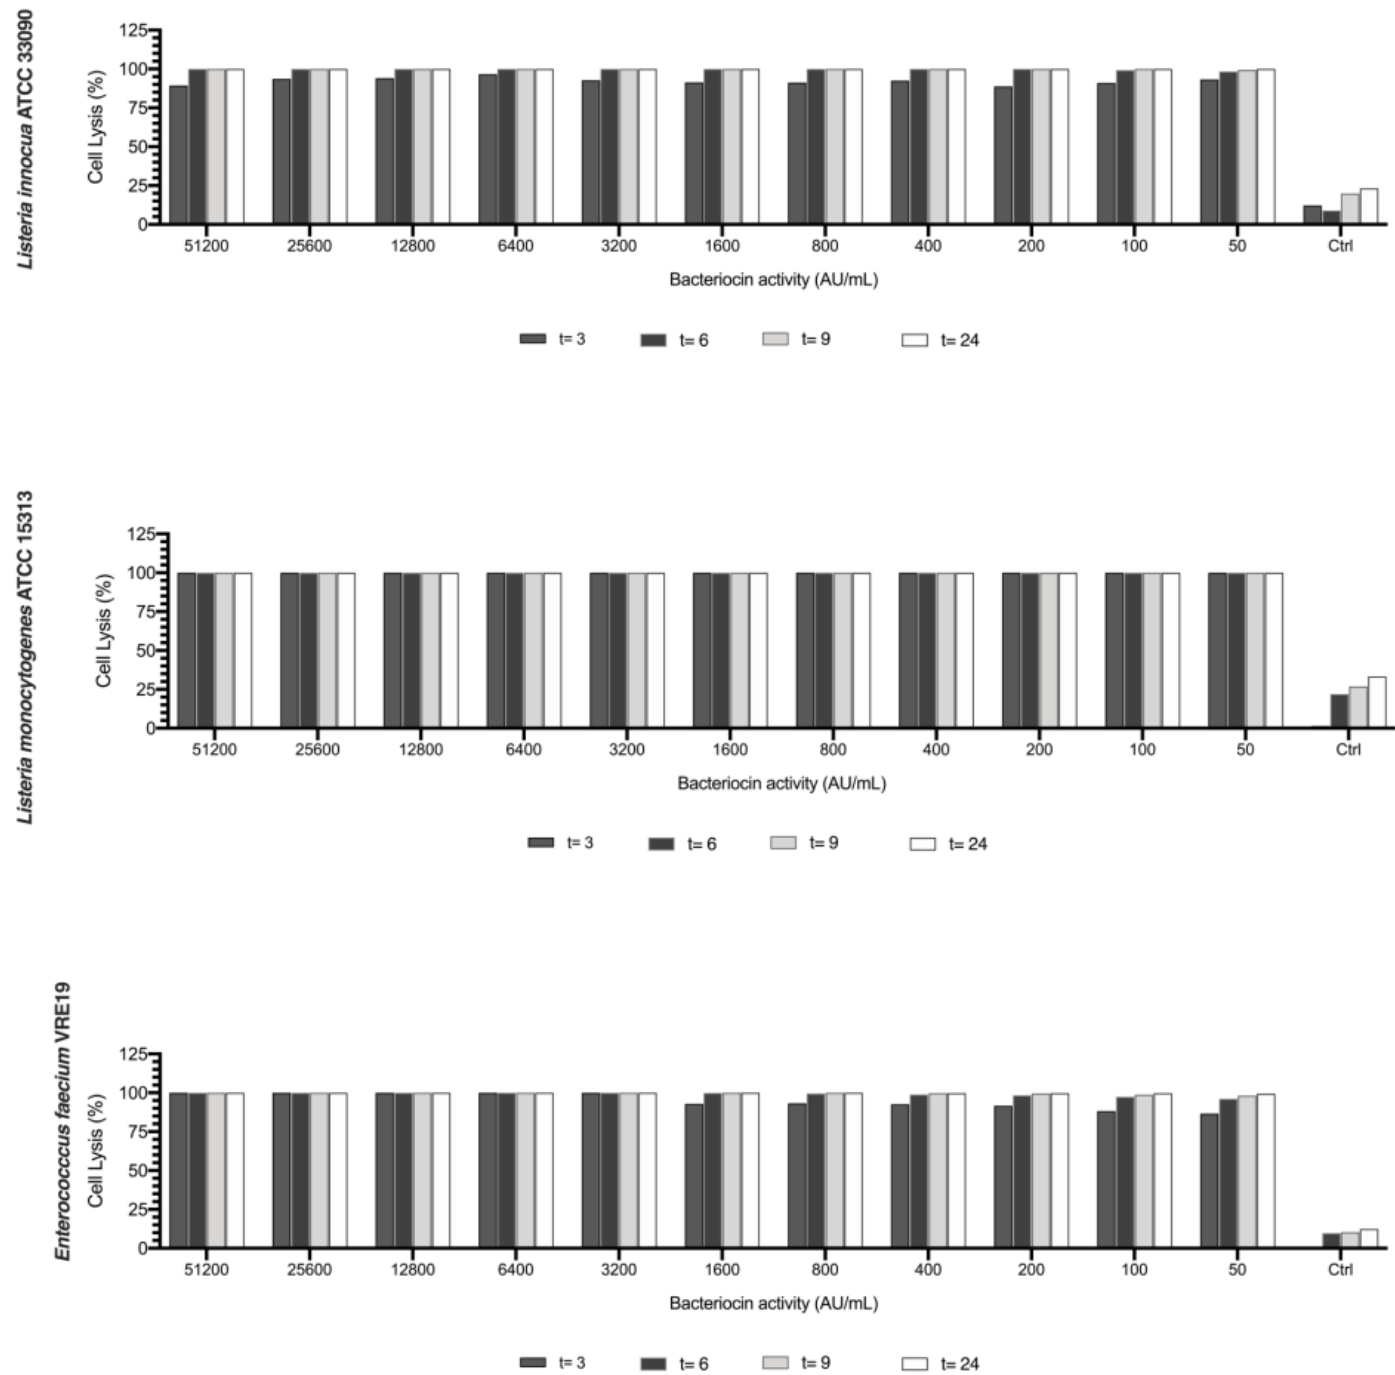

**(C) Bacteriocin ST7319ea**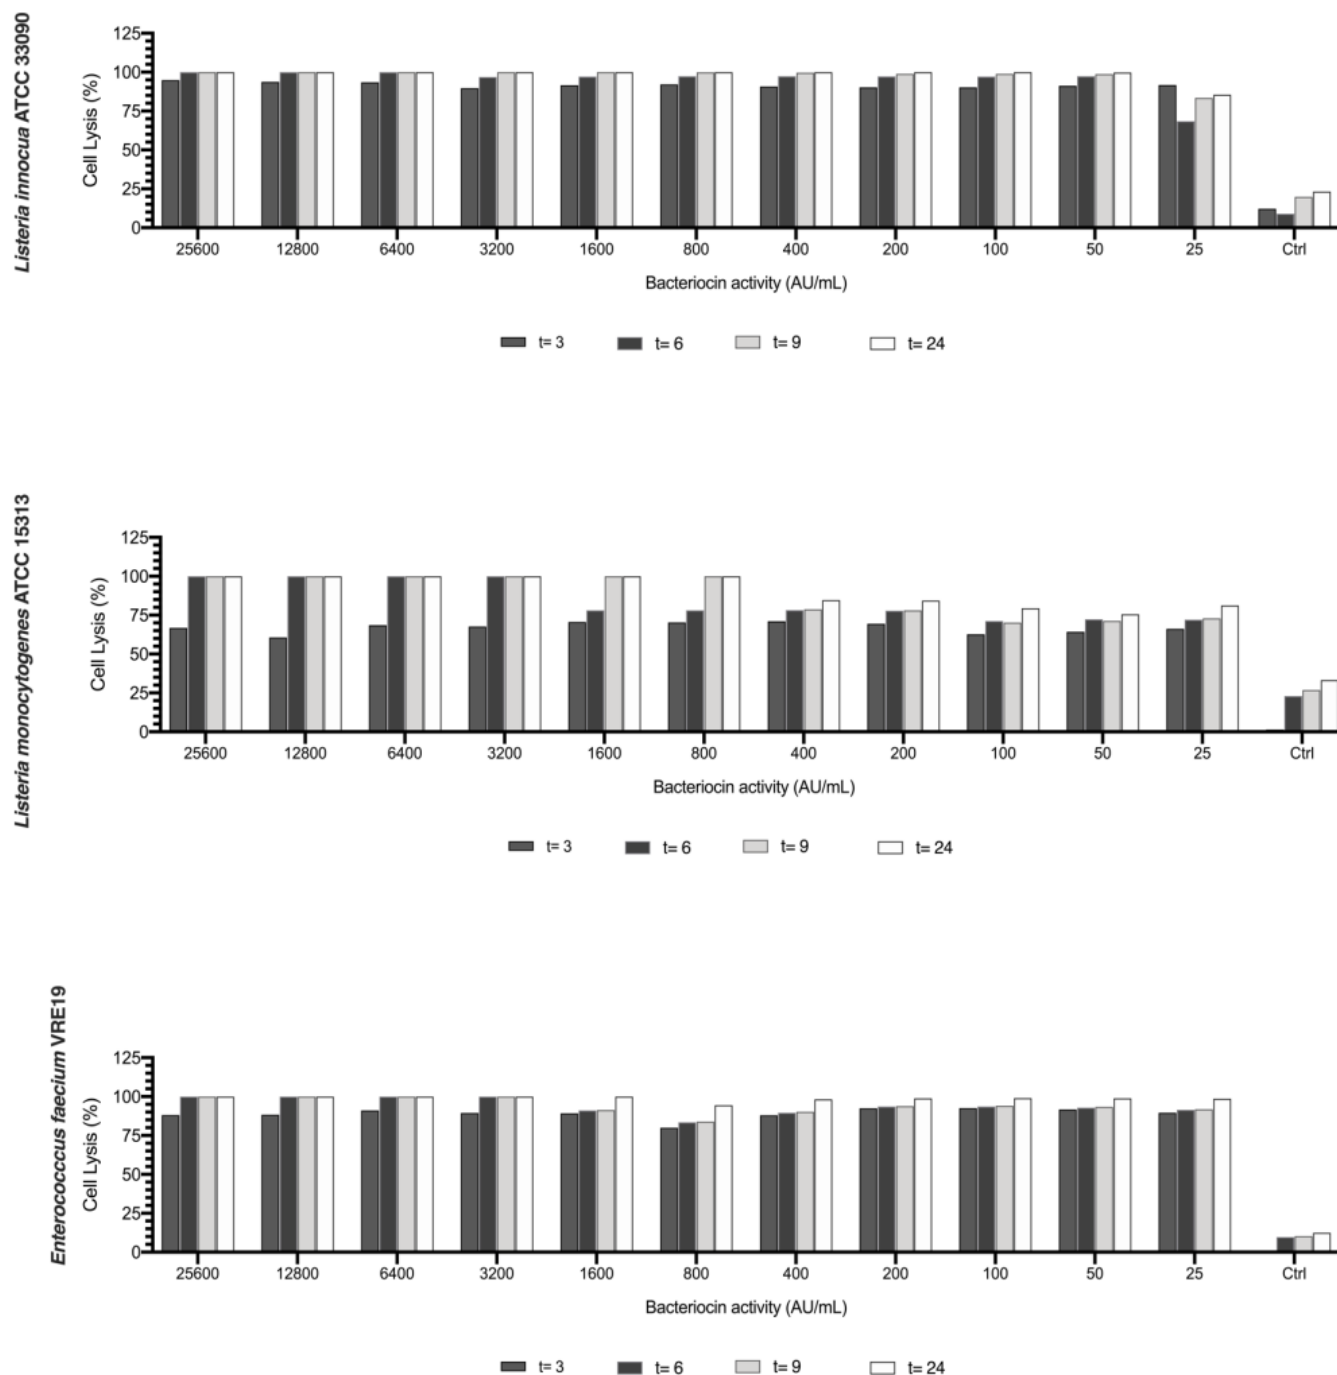

**Figure S5.** Rate of cell lysis (%) of non-metabolically active *Listeria innocua* ATCC 33090, *Listeria monocytogenes* ATCC 15313, and *Enterococcus faecium* VRE19 treated with various concentrations of partially purified (A) bacteriocin ST651ea, (B) bacteriocin ST7119ea and (C) bacteriocin ST7319ea (on periods 3h, 6h, 9h, and 24h).
